# Supplementary material for: A dose response model for quantifying the infection risk of antibiotic-resistant bacteria
Source: PubMed Central journal article supplement (PMC6863845; doi:10.1038/s41598-019-52947-3), 2019-11-19
Supplement: 41598_2019_52947_MOESM1_ESM.pdf [file 41598_2019_52947_MOESM1_ESM.pdf]

# A dose response model for quantifying the infection risk of antibiotic-resistant bacteria

Srikiran Chandrasekaran<sup>1</sup> Sunny C. Jiang<sup>1,\*</sup>

<sup>1</sup>University of California Irvine, Civil and Environmental Engineering, Irvine, 92697, United States

\*Corresponding author (sjiang@uci.edu)

## Supplementary Materials

### Datasets used in this study

| ID  | [Ref] | Dose     | $n_{\text{ill}}$ | $n_{\text{tot}}$ | $t_{\text{fs}}$ (days) |
|-----|-------|----------|------------------|------------------|------------------------|
| DS1 | [1]   | 1.00e+04 | 0                | 5                | 1                      |
|     |       | 1.00e+04 | 0                | 5                |                        |
|     |       | 1.00e+06 | 0                | 5                |                        |
|     |       | 1.00e+06 | 1                | 9                |                        |
|     |       | 1.00e+08 | 5                | 8                |                        |
|     |       | 1.00e+08 | 3                | 5                |                        |
| DS2 | [1]   | 1.00e+06 | 0                | 4                | 2.625                  |
|     |       | 1.00e+06 | 1                | 5                |                        |
|     |       | 1.00e+08 | 1                | 5                |                        |
|     |       | 5.00e+08 | 3                | 5                |                        |
|     |       | 2.50e+09 | 6                | 6                |                        |
|     |       | 1.00e+10 | 9                | 10               |                        |
|     |       | 1.00e+10 | 9                | 14               |                        |
|     |       | 1.00e+10 | 3                | 5                |                        |
|     |       | 1.00e+10 | 5                | 5                |                        |
|     |       | 2.00e+10 | 2                | 2                |                        |
|     |       | 2.30e+10 | 14               | 19               |                        |

Table S1: Datasets used in this study

## Parameter ranges for sensitivity analysis

| Parameter      | Units              | Lower bound           | Upper bound           |
|----------------|--------------------|-----------------------|-----------------------|
| $C$            | mg L <sup>-1</sup> | 0.00                  | 0.05                  |
| $f_r$          | -                  | 0.00                  | 0.10                  |
| $\log_{10}(d)$ | -                  | 1.00                  | 4.00                  |
| $E_{\max}^*$   | day <sup>-1</sup>  | 612.00                | 1836.00               |
| $EC_{50}^*$    | mg L <sup>-1</sup> | 4.96                  | 14.89                 |
| $r^*$          | CFU <sup>-1</sup>  | $5.33 \times 10^{-9}$ | $1.59 \times 10^{-8}$ |
| $t_{fs}$       | days               | 1.50                  | 2.50                  |

Table S2: Parameter ranges for exponential model. Parameters with \* are increased and decreased by 50% of the values used in Fig. 2.

| Parameter      | Units              | Lower bound        | Upper bound        |
|----------------|--------------------|--------------------|--------------------|
| $C$            | mg L <sup>-1</sup> | 0.00               | 0.05               |
| $f_r$          | -                  | 0.00               | 0.10               |
| $\log_{10}(d)$ | -                  | 1.00               | 4.00               |
| $E_{\max}^*$   | day <sup>-1</sup>  | 612.00             | 1836.00            |
| $EC_{50}^*$    | mg L <sup>-1</sup> | 4.96               | 14.89              |
| $\alpha^*$     | -                  | 0.08               | 0.24               |
| $\beta^*$      | -                  | $7.07 \times 10^6$ | $2.12 \times 10^7$ |
| $t_{fs}$       | days               | 2                  | 3                  |

Table S3: Parameter ranges for  $\beta$ -Poisson model. Parameters with \* are increased and decreased by 50% of the values used in Fig. 2.

## $\beta$ -Poisson procedure verification

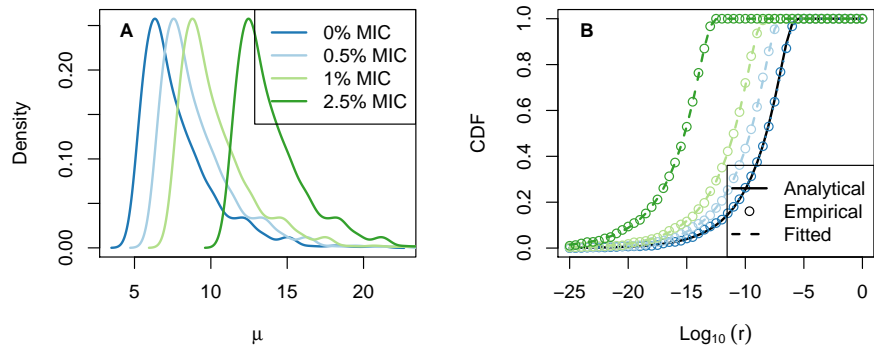

Figure S1: Verify conversion procedure for  $\beta$ -Poisson model. (A) Plot of  $\mu$  at various concentration. (B) Comparison of empirical CDF of the sampled  $r$  values and the CDF from the fitted Beta distributions. The analytical CDF at 0% MIC is also shown for comparison.

## Methods

### Using the Simple Death DRM

Suppose we are interested in calculating the response for a pathogen. It is present in an exposure case with  $d = 1000$ , with 20% of the pathogen being resistant to an antibiotic, and the concentration of antibiotic is  $C = 0.025 \times \text{MIC} (2 \mu\text{g mL}^{-1}) = 0.05 \mu\text{g/mL}$ .

- Identify dose-response data for the pathogen. This can be like DS1 or DS2 listed in Table S1.
- Identify  $t_{\text{fs}}$ . This is the latest time at which some subject shows the first symptom. Suppose  $t_{\text{fs}} = 1$  day
- Identify  $E_{\text{max}}$  and  $EC_{50}$  for the antibiotic-pathogen combination of interest. Suppose  $E_{\text{max}} = 1224 \text{ day}^{-1}$  and  $EC_{50} = 9.93 \text{ mg L}^{-1} = 9.93 \mu\text{g mL}^{-1}$ .
- Fit both exponential and  $\beta$ -Poisson models to this dataset and identify the best fitting model, using methods outlined in [2].
- If best fitting model is exponential, go to section titled "Using exponential DRM". If best fitting model is  $\beta$ -Poisson, go to section titled "Using  $\beta$ -Poisson DRM".

Our sensitivity analyses indicate that getting approximate values for  $t_{\text{fs}}$  are sufficient to predict response. However, it's value is critical to accurately estimate death rate ( $\mu$ ) if using the exponential DRM.

### Using exponential DRM

The exponential model is given by:

$$P(d) = 1 - \exp(-rd)$$

Suppose the best fit for  $r$  is given by  $\hat{r} = 1.07 \times 10^{-8}$ .

- Compute  $\mu$  by solving

$$(1 - \exp(-\mu t_{\text{fs}})) = \exp(-\hat{r})$$

to get

$$\mu = -\log(1 - \exp(-\hat{r}))/t_{\text{fs}} = 7.97 \text{ day}^{-1}$$

- Compute  $\mu_{s,\text{AB}}(C)$  using

$$\mu_{s,\text{AB}}(C) = \mu + \frac{E_{\text{max}}C}{EC_{50} + C} = 7.97 \text{ day}^{-1} + \frac{1224 \text{ day}^{-1} \times 0.05 \mu\text{g mL}^{-1}}{(9.93 + 0.05) \mu\text{g mL}^{-1}} = 14.10 \text{ day}^{-1}$$

- Set  $\mu_{r,AB} = \mu = 7.97 \text{ day}^{-1}$
- Compute extinction probabilities for the susceptible and resistant subpopulations using

$$P_{\text{ext},s}(d|f_r, C) = (1 - \exp(-\mu_{s,AB}(C)t_{fs}))^{d \times (1-f_r)} \approx 0.999400822$$

and

$$P_{\text{ext},r}(d|f_r, C) = (1 - \exp(-\mu_{r,AB}t_{fs}))^{d \times f_r} \approx 0.933317727$$

- Compute total response probability with

$$P(d|f_r, C) = 1 - P_{\text{ext},s}(d|f_r, C)P_{\text{ext},r}(d|f_r, C) \approx 0.067241497$$

- If  $(1 - P_{\text{ext},s}(d, t|f_r, C))P_{\text{ext},r}(d, t|f_r, C) > (1 - P_{\text{ext},r}(d, t|f_r, C))$ , illness is AB treatable. If not, illness is not AB treatable. In this case, this condition evaluates to False and hence the illness is likely not AB treatable.

### Using $\beta$ -Poisson DRM

The  $\beta$ -Poisson DRM is given by

$$P(d) = 1 - \left(1 + \left(\frac{d}{\beta}\right)\right)^{-\alpha}$$

Suppose the best fit parameters are  $\hat{\alpha} \approx 0.1615058$  and  $\hat{\beta} = 1414958$ . Computing response probabilities is more involved and requires access to a function that can fit a beta distribution, such as the `fitdistrplus` package in R ([3]).

- From the values of  $\hat{\alpha}$ ,  $\hat{\beta}$ ,  $E_{\text{max}}$ ,  $EC_{50}$  and  $C$ , compute  $\alpha_s$  and  $\beta_s$  for the susceptible subpopulation. For this, use the algorithm outlined in the Methods section. We get  $\alpha_s = 0.1613020$  and  $\beta_s = 1.295420 \times 10^{13}$ .
- Set  $\alpha_r = \hat{\alpha}$  and  $\beta_r = \hat{\beta}$  for the resistant subpopulation.
- Compute extinction probabilities for the susceptible and resistant subpopulations using

$$P_{\text{ext},s}(d|f_r, C) = \left(1 + \left(\frac{d \times (1-f_r)}{\beta_s}\right)\right)^{-\alpha_s} = 1$$

and

$$P_{\text{ext},r}(d|f_r, C) = \left(1 + \left(\frac{d \times f_r}{\beta_r}\right)\right)^{-\alpha_r} \approx 0.999977202$$

- Compute total response probability with

$$P(d|f_r, C) = 1 - P_{\text{ext},s}(d|f_r, C)P_{\text{ext},r}(d|f_r, C) \approx 2.28 \times 10^{-5}$$

- If  $(1 - P_{\text{ext},s}(d, t|f_r, C))P_{\text{ext},r}(d, t|f_r, C) > (1 - P_{\text{ext},r}(d, t|f_r, C))$ , illness is AB treatable. If not, illness is not AB treatable. In this case, this condition evaluates to False and hence the illness is likely AB untreatable.

## References

- [1] Tacket, C. O. *et al.* Role of EspB in Experimental Human Enteropathogenic Escherichia coli Infection. *Infection and Immunity* **68**, 3689–3695 (2000). URL <http://iai.asm.org/cgi/doi/10.1128/IAI.68.6.3689-3695.2000>.
- [2] Haas, C. N., Rose, J. B. & Gerba, C. P. *Quantitative Microbial Risk Assessment* (John Wiley & Sons, Inc, Hoboken, New Jersey, 2014). URL <http://doi.wiley.com/10.1002/9781118910030>.
- [3] Delignette-Muller, M. & Dutang, C. fitdistrplus: An R Package for Fitting Distributions. *Journal of Statistical Software, Articles* **64**, 1–34 (2015). URL <https://www.jstatsoft.org/v064/i04>.
